# Supplementary material for: Rh nanoparticle functionalized heteroatom-doped hollow carbon spheres for efficient electrocatalytic hydrogen evolution
Source: Royal Society of Chemistry journal article supplement (doi:10.1039/d1qm00156f), 2021-01-01
Supplement: d1qm00156f1.pdf [file d1qm00156f1.pdf]

## Supporting Information for

### **Rh nanoparticles functionalized heteroatom-doped hollow carbon sphere for efficient electrocatalytic hydrogen evolution**

Defeng Qi,<sup>†</sup> Shuai Liu,<sup>†</sup> Honghui Chen,<sup>†</sup> Shuhua Lai, Yongji Qin,<sup>\*</sup> Yuan Qiu, Sheng Dai,<sup>\*</sup> Shusheng Zhang, Jun Luo, and Xijun Liu,<sup>\*</sup>

<sup>†</sup> These authors contributed equally to this work.

## Experimental section

### 1.1 Chemicals

Hydrofluoric acid (HF) ( $\geq 99.99998\%$ ), tetraethyl orthosilicate (TEOS) ( $> 99\%$ ), resorcinol ( $99\%$ ), rhodium acetylacetonate ( $\text{Rh}(\text{acac})_3$ ) ( $99.99\%$ ), potassium hydroxide ( $85\%$ ) were obtained from Shanghai Aladdin Biochemical Technology Co., Ltd. Ethanol (EtOH) ( $> 99.7\%$ ), ammonia solution ( $\text{NH}_3 \text{ H}_2\text{O}$ ) ( $25\sim 28\%$ ), formaldehyde (HCHO) solution ( $37\sim 40\%$ ), thiourea ( $\geq 99.5\%$ ), hydrazine hydrate aqueous solution ( $\text{N}_2\text{H}_4 \text{ H}_2\text{O}$ ) ( $85\%$ ) were purchased from Sinopharm Chemical Reagent Co., Ltd. Pluronic F127 (average Mn 9840-14600) was obtained from Beijing Jinming Biotechnology Co., Ltd.

### 1.2 Synthesis of NS-HCS

The synthesis of NS-HCS was based on a previous report with a little modification [1]. Typically, 2.8 mL TEOS was dropwise added into a mixture of 2.5 mL  $\text{NH}_3 \text{ H}_2\text{O}$ , 60 mL EtOH and 20 mL  $\text{H}_2\text{O}$  for 30 min under stirring at room temperature (RT). Then 0.3 g F127 was dissolved in the above solution followed by 1.2 mmol resorcinol and 0.56 mL HCHO solution. After another 30 min stirring, 4.8 mmol thiourea and 0.42 mL HCHO solution were added. The mixture was kept stirring for 24 h at RT and then moved into a Teflon lined autoclave. The autoclave was sealed and placed in a preheated oven at  $100\text{ }^\circ\text{C}$  for 24 h. The precipitate was centrifuged, washed by  $\text{H}_2\text{O}$  and EtOH and desiccated at  $60\text{ }^\circ\text{C}$ . The solid was calcined at  $500\text{ }^\circ\text{C}$  for 1 h and subsequently at  $700\text{ }^\circ\text{C}$  for 2 h with a heating rate of  $1\text{ }^\circ\text{C min}^{-1}$ . The NS-HCS was obtained after the  $\text{SiO}_2$  core was etched by 10 wt% HF solution.

### 1.3 Synthesis of Rh-NS-HCS

Typically, 30 mg NS-HCS and 9 mg Rh(acac)<sub>3</sub> were dispersed in 30 mL DMF under stirring. After refluxing at 80 °C for 5 h, the mixture was heated at 65 °C to evaporate DMF. The solid was heated at 700 °C for 1 h with a heating rate of 5 °C min<sup>-1</sup> and washed by 5 mL 1 M HCl at 80 °C for 12 h. The product was obtained after drying in oven at 60 °C overnight.

### 1.4 Characterizations

The morphology and structure were characterized by a transmission electron microscopy (TEM, FEI Talos F200X) and a scanning electron microscope (SEM, Verios 460L) operated at 20 kV. The samples for SEM analysis were sputtered before test to avoid charging. The high-angle annular dark-field scanning TEM (HAADF-STEM), energy-dispersive X-ray spectroscopy (EDX) and elemental mapping were tested by a probe-corrected TEM (PCTEM, FEI Titan Themis Cubed G2 60-300). Powder X-ray diffraction pattern (XRD) was carried out on a Rigaku SmartLab 9KW with Cu K $\alpha$  radiation ( $\lambda = 1.54598 \text{ \AA}$ ) at a scan rate of 10° min<sup>-1</sup> from 3° to 90° operated at 40 kV and 40 mA.. The valence statuses of elements were performed on an X-ray photoelectron spectroscopy (XPS, Thermo Fisher Scientific ESCALAB 250Xi).

### 1.5 Electrochemical characterization

CHI 760E (Chenhua, Shanghai) workstation was utilized to measure all the electrochemical tests with a 5-necked flask for three-electrode tests and a beaker for two-electrode tests. All the inks were made by mixing 3 mg catalyst, 500  $\mu$ L EtOH and 500  $\mu$ L 0.5 wt% Nafion solution. After ultrasound treating for 0.5 h, 0.2 mL of inks

were dropwise dried on 1×1 cm carbon paper to make working electrodes with 0.5 mg cm<sup>-2</sup> loading. In typical three-electrode system, Pt foil and Hg/HgO electrode were used as counter electrode and reference electrode, respectively. In a typical two-electrode system, two working electrodes were used as both anodic and cathodic electrodes. HER results were obtained in 1 M KOH aqueous solution, while HzOR and OHzS were carried out in the same electrolyte but with extra 0.5 M hydrazine hydrate. All potential values were transformed to reversible hydrogen electrode (RHE) potentials with IR calibration, following the equation:  $E_{\text{RHE}} = E_{\text{Hg/HgO}} + 0.098 \text{ V} + 0.059 \text{ pH}$ . The electrochemical impedance spectroscopy (EIS) was performed from 10<sup>5</sup> to 10<sup>-2</sup> Hz with 5 mV amplitude at open-circuit potentials.

## Figures

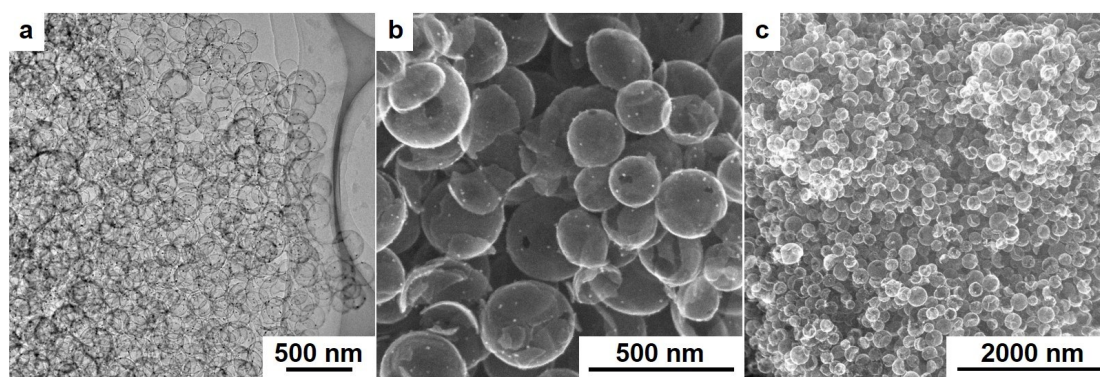

Figure S1. TEM (a), high (b) and low (c) magnification SEM images of Rh-NS-HCS.

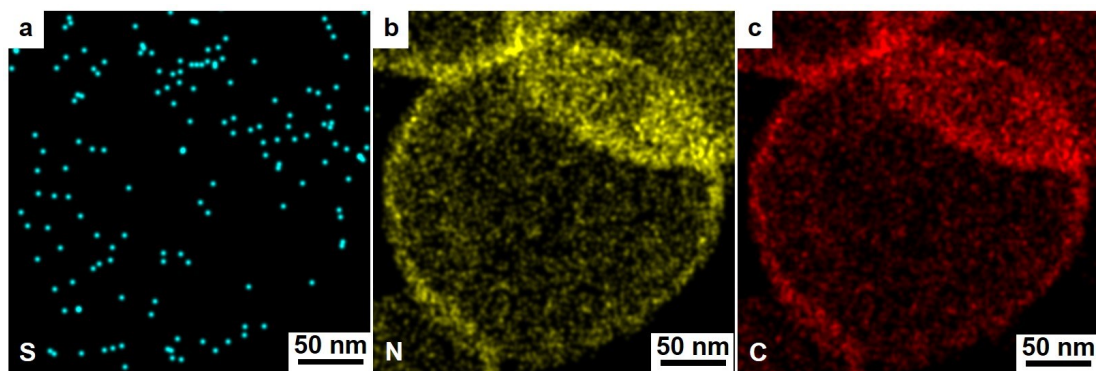

Figure S2. The elemental maps of Rh-NS-HCS : (a) S; (b) N; (c) C.

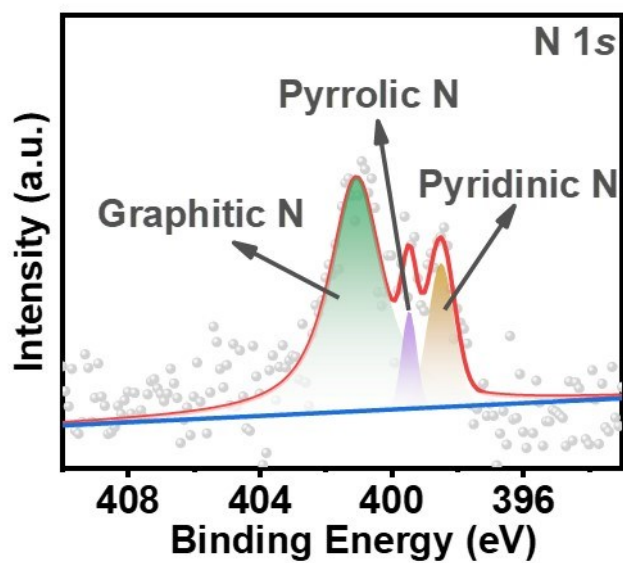

Figure S3. High resolution XPS spectra of N 1s. The high-resolution N 1s spectra is identified by the 401, 399.5 and 398.5 eV peaks, which could be assigned to graphitic N (77.2 %), pyrrolic N (6.4 %) and pyridinic N (16.4 %), respectively, typically observed in the case of N doping carbon materials.[2]

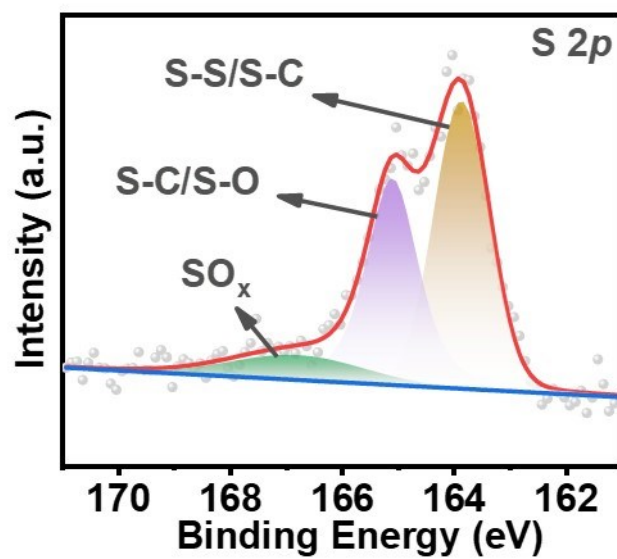

Figure S4. High resolution XPS spectra of S. The high-resolution S 2p spectra could be deconvoluted into three peaks around at 167, 165.1 and 163.8 eV, corresponding to sulfate, S-C/S-O and S-S/S-C groups, respectively.[3]



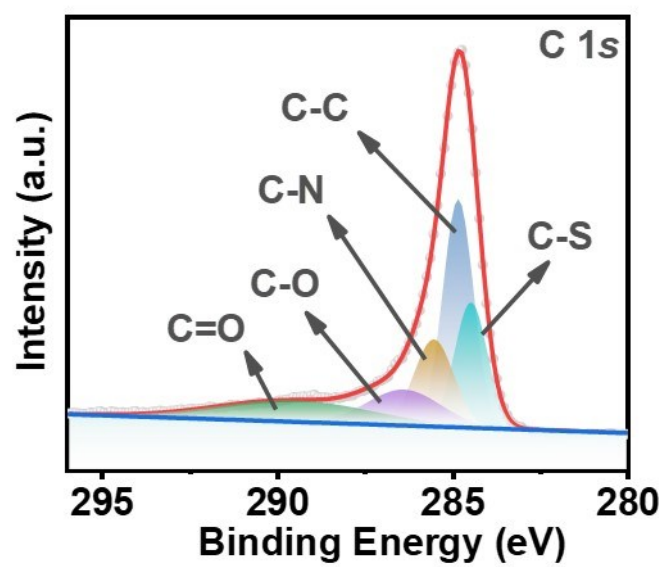

Figure S5. High resolution XPS spectra of C 1s.

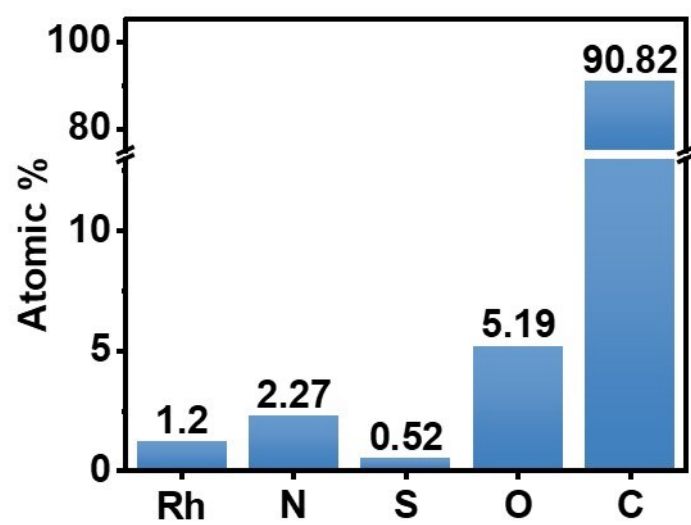

Figure S6. XPS elemental analysis of Rh-NS-HCS.

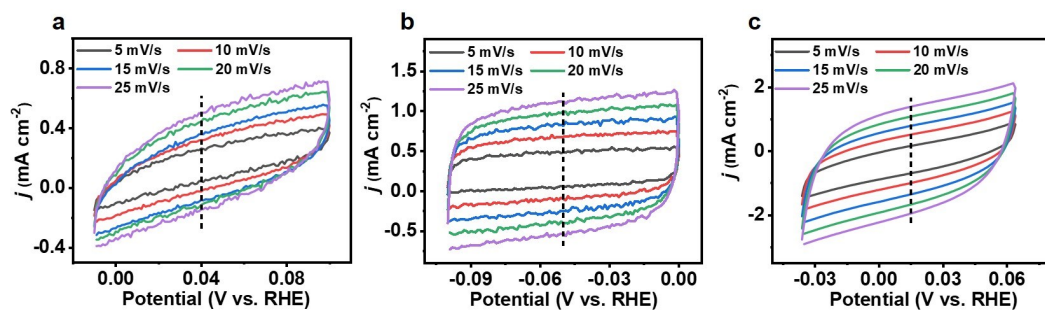

Figure S7. CV curves at different scan rates of (a) Pt/C; (b) NS-HCS; (c) Rh-NS-HCS.

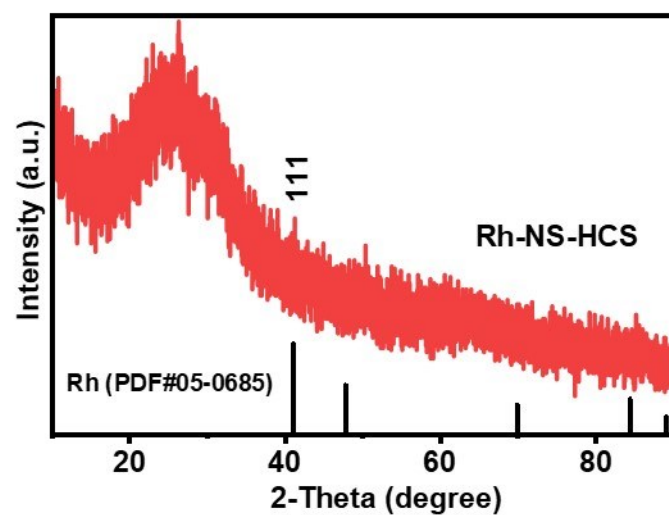

Figure S8. XRD pattern of Rh-NS-HCS after stability test.

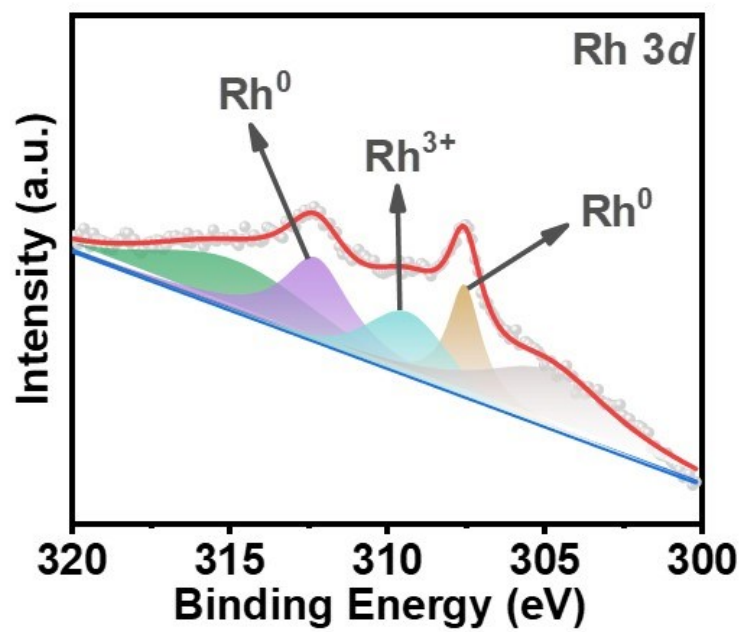

Figure S9. High resolution XPS spectra of Rh-NS-HCS after stability test.

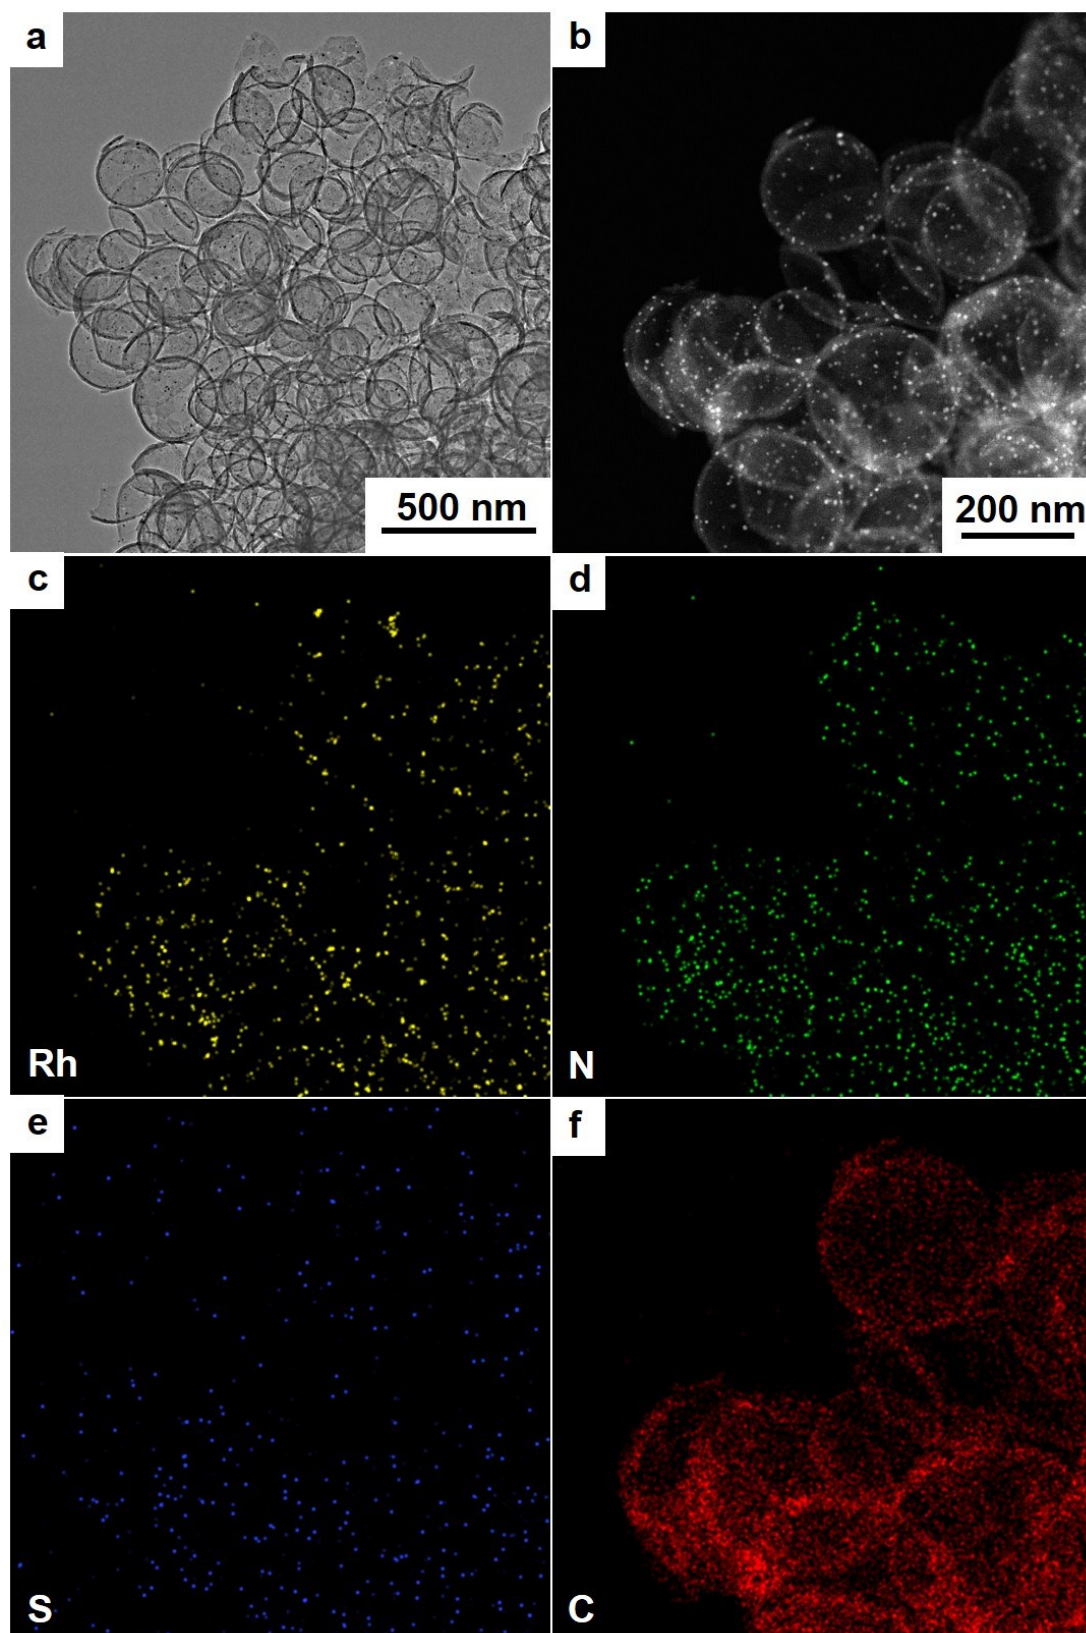

Figure S10. TEM (a), HAADF-STEM (b) and elemental mapping (c-f) images of Rh-NS-HCS after stability test.

Table S1. HER performances of this work and previous reports.

| Sample                                 | Particles size (nm) | Weight ratio (%) | Electrolyte | Overpotential at 10 mA cm <sup>-2</sup> (mV) | Tafel slope (mV dec <sup>-1</sup> ) | ref                                        |
|----------------------------------------|---------------------|------------------|-------------|----------------------------------------------|-------------------------------------|--------------------------------------------|
| Rh–MoSe2                               | 2.5                 | 8.2              | 1 M KOH     | 73                                           | 123                                 | Inorg. Chem. Front., 2018, 5, 2978         |
| Rh nanosheets                          | -                   | -                | 1 M KOH     | 42                                           | 30                                  | Nanoscale, 2019, 11, 9319                  |
| Rh–Rh2O3-NPs/C                         | 10                  | 79.15            | 0.5 M KOH   | 63                                           | 70                                  | J. Mater. Chem. A, 2018, 6, 23531          |
| Rh NP/C                                | ~ 2                 | 23.4             | 1 M KOH     | 7                                            | 19                                  | <i>Adv. Energy Mater.</i> 2018, 8, 1801698 |
| Rh/NiFeRh-LDH                          | 0.8                 | 4                | 1 M KOH     | 58                                           | 81.3                                | Nano Lett. 2020, 20, 136                   |
| 0.5Rh-GS1000                           | 3                   | 0.5              | 1 M KOH     | 25                                           | 50                                  | ACS Sustainable Chem. Eng. 2019, 7, 18835  |
| Rh-doped CoFe-ZLDH                     | -                   | 20               | 1 M KOH     | 28                                           | 42.8                                | Adv. Funct. Mater. 2020, 30, 2003556       |
| Rh NSs                                 | -                   | -                | 1 M KOH     | 43                                           | 107.2                               | Chem. Mater. 2017, 29, 5009                |
| Rh <sub>1</sub> Sn <sub>2</sub> /SWNTs | 5                   | -                | 1 M KOH     | 46                                           | 81.11                               | Int. J. Hydrogen Energ. 45 (2020) 32050    |
| Rh@NPCP                                | 2.5                 | 9.84             | 1 M KOH     | 20                                           | 33                                  | Electrochimica Acta 326 (2019) 134982      |
| Rh-NS-HCS                              | 4                   | 5                | 1 M KOH     | 72                                           | 107                                 | This work                                  |

Table S2. HzOR performances of this work and previous reports.

| Sample        | Electrolyte                                                                          | Overpotential<br>at 10 mA cm <sup>-2</sup><br>(mV) | Overpotential<br>at 100 mA cm <sup>-2</sup><br>(mV) | ref                                                                |
|---------------|--------------------------------------------------------------------------------------|----------------------------------------------------|-----------------------------------------------------|--------------------------------------------------------------------|
| Cu1Nu2-N      | 1 M KOH + 0.5 M<br>N <sub>2</sub> H <sub>4</sub> H <sub>2</sub> O                    | -                                                  | ~200                                                | <i>Adv. Energy Mater.</i> <b>2019</b> , 9,<br>1900390              |
| D-<br>MoP/rGO | 1 M KOH + 0.5 M<br>N <sub>2</sub> H <sub>4</sub> H <sub>2</sub> O                    | 84                                                 | -                                                   | <i>Inorg. Chem. Front.</i> <b>2019</b> ,<br>6, 2686                |
| CoSe2         | 1 M KOH + 0.5 M<br>N <sub>2</sub> H <sub>4</sub> H <sub>2</sub> O                    | -                                                  | 150                                                 | <i>Angew. Chem. Int. Ed.</i><br><b>2018</b> , 57, 7649             |
| Fe-CoS2       | 1 M KOH + 0.1 M<br>N <sub>2</sub> H <sub>4</sub> H <sub>2</sub> O                    | -                                                  | 129                                                 | <i>Nat. Commun.</i> <b>2018</b> , 9,<br>4365                       |
| Ni3S2/NF      | 1 M KOH + 0.2 M<br>N <sub>2</sub> H <sub>4</sub> H <sub>2</sub> O                    | -                                                  | 415                                                 | <i>J. Mater. Chem. A</i> <b>2018</b> , 6,<br>19201                 |
| Rh/N-CB       | 1 M KOH + 0.05 M<br>N <sub>2</sub> H <sub>4</sub> H <sub>2</sub> O                   | 72                                                 | -                                                   | ACS Appl. Mater.<br>Interfaces 2019, 11, 35039                     |
| Rh2S3/NC      | 1 M KOH + 0.1 M<br>N <sub>2</sub> H <sub>4</sub> H <sub>2</sub> O                    | 95                                                 | 154                                                 | Small Methods 2020,<br>2000208                                     |
| RuP2-<br>CPM  | 1 M KOH + 0.3 M<br>N <sub>2</sub> H <sub>4</sub> H <sub>2</sub> O                    | 70                                                 | -                                                   | <i>Sci. Adv.</i> , 2020, <b>6</b> , eabb4197                       |
| Rh2P<br>uNSs, | 0.5 M H2SO4 + 0.05<br>M N <sub>2</sub> H <sub>4</sub> H <sub>2</sub> O               | 10                                                 | -                                                   | <i>Applied Catalysis B:<br/>Environmental</i> 270 (2020)<br>118880 |
| Pt(111)       | 0.1 M HClO4 +<br>1mM NaCl + 0.01 M<br>N <sub>2</sub> H <sub>4</sub> H <sub>2</sub> O | -                                                  | 450                                                 | <i>ChemElectroChem</i> <b>2017</b> , 4,<br>1130                    |
| Rh-NS-<br>HCS | 1 M KOH + 0.5 M<br>N <sub>2</sub> H <sub>4</sub> H <sub>2</sub> O                    | 84                                                 | 427                                                 | This work                                                          |



Table S3. OH<sub>2</sub>S performances of this work and previous reports.

| Bifunctional catalyst              | Electrolyte                                                    | Cell voltage @ 10 mA cm <sup>-2</sup> | Cell voltage @ 100 mA cm <sup>-2</sup> | ref                                          |
|------------------------------------|----------------------------------------------------------------|---------------------------------------|----------------------------------------|----------------------------------------------|
| CoP/TiM                            | 1 M KOH + 0.1 M N <sub>2</sub> H <sub>4</sub> H <sub>2</sub> O | 0.2 V                                 | -                                      | ChemElectroChem 2017, 4, 481                 |
| Ni <sub>2</sub> P/NF               | 1 M KOH + 0.5 M N <sub>2</sub> H <sub>4</sub> H <sub>2</sub> O | -                                     | 0.45 V                                 | Angew. Chem. Int. Ed. 2017, 56, 842          |
| Ni(Cu)/NF                          | 1 M KOH + 0.5 M N <sub>2</sub> H <sub>4</sub> H <sub>2</sub> O | -                                     | 0.41 V                                 | ACS Sustainable Chem. Eng. 2018, 6, 12746    |
| Fe-CoS <sub>2</sub>                | 1 M KOH + 0.1 M N <sub>2</sub> H <sub>4</sub> H <sub>2</sub> O | -                                     | 0.95 V @ 500 mA cm <sup>-2</sup>       | Nat. Commun., 2018, 9, 4365                  |
| Rh/N-CB                            | 1 M KOH + 0.5 M N <sub>2</sub> H <sub>4</sub> H <sub>2</sub> O | 0.2 V @ 20 mA cm <sup>-2</sup>        | -                                      | ACS Appl. Mater. Interfaces 2019, 11, 35039  |
| CoP/NCNT-CP                        | 1 M KOH + 0.5 M N <sub>2</sub> H <sub>4</sub> H <sub>2</sub> O | 0.89 V                                | -                                      | ACS Sustainable Chem. Eng. 2019, 7, 10044    |
| D-MoP/rGO                          | 1 M KOH + 0.5 M N <sub>2</sub> H <sub>4</sub> H <sub>2</sub> O | -                                     | 0.74 V                                 | Inorg. Chem. Front., 2019, 6, 2686           |
| PW-Co <sub>3</sub> N NWA/NF        | 1 M KOH + 0.1 M N <sub>2</sub> H <sub>4</sub> H <sub>2</sub> O | 0.028 V                               | 0.171 V                                | Nat. Commun., 2020, 11, 1853                 |
| Rh <sub>2</sub> S <sub>3</sub> /NC | 1 M KOH + 0.1 M N <sub>2</sub> H <sub>4</sub> H <sub>2</sub> O | 0.108 V                               | 0.393 V                                | Small Methods 2020, 2000208                  |
| DH <sub>2</sub> FC                 | 1 M KOH + 0.2 M N <sub>2</sub> H <sub>4</sub> H <sub>2</sub> O | 0.071 V                               | 0.76 V                                 | Angew. Chem. Int. Ed. 10.1002/anie.202014362 |
| Rh-NS-HCS                          | 1 M KOH + 0.5 M N <sub>2</sub> H <sub>4</sub> H <sub>2</sub> O | 0.106 V                               | 0.595 V                                | This work                                    |

## References

- [1] S. Ma, P. Su, W. Huang, S.P. Jiang, S. Bai, J. Liu, Atomic Ni species anchored N-doped carbon hollow spheres as nanoreactors for efficient electrochemical CO<sub>2</sub> reduction, *ChemCatChem* 11 (2019) 6092-6098.
- [2] T. Zhang, X. Han, H. Yang, A. Han, E. Hu, Y. Li, X.Q. Yang, L. Wang, J. Liu, B. Liu, Atomically dispersed nickel(I) on an alloy-encapsulated nitrogen-doped carbon nanotube array for high-performance electrochemical CO<sub>2</sub> reduction reaction, *Angew. Chem. Int. Ed.* 59 (2020) 12055-12061.
- [3] X. Wen, X. Lu, K. Xiang, L. Xiao, H. Liao, W. Chen, W. Zhou, H. Chen, Nitrogen/sulfur co-doped ordered carbon nanoarrays for superior sulfur hosts in lithium-sulfur batteries, *J. Colloid Interf. Sci.* 554 (2019) 711-721.
